# Supplementary material
Source: PubMed Central journal article supplement (PMC123704)

A. Phylogram of bacterial and eukaryotic aconitase and aconitase-like proteins.

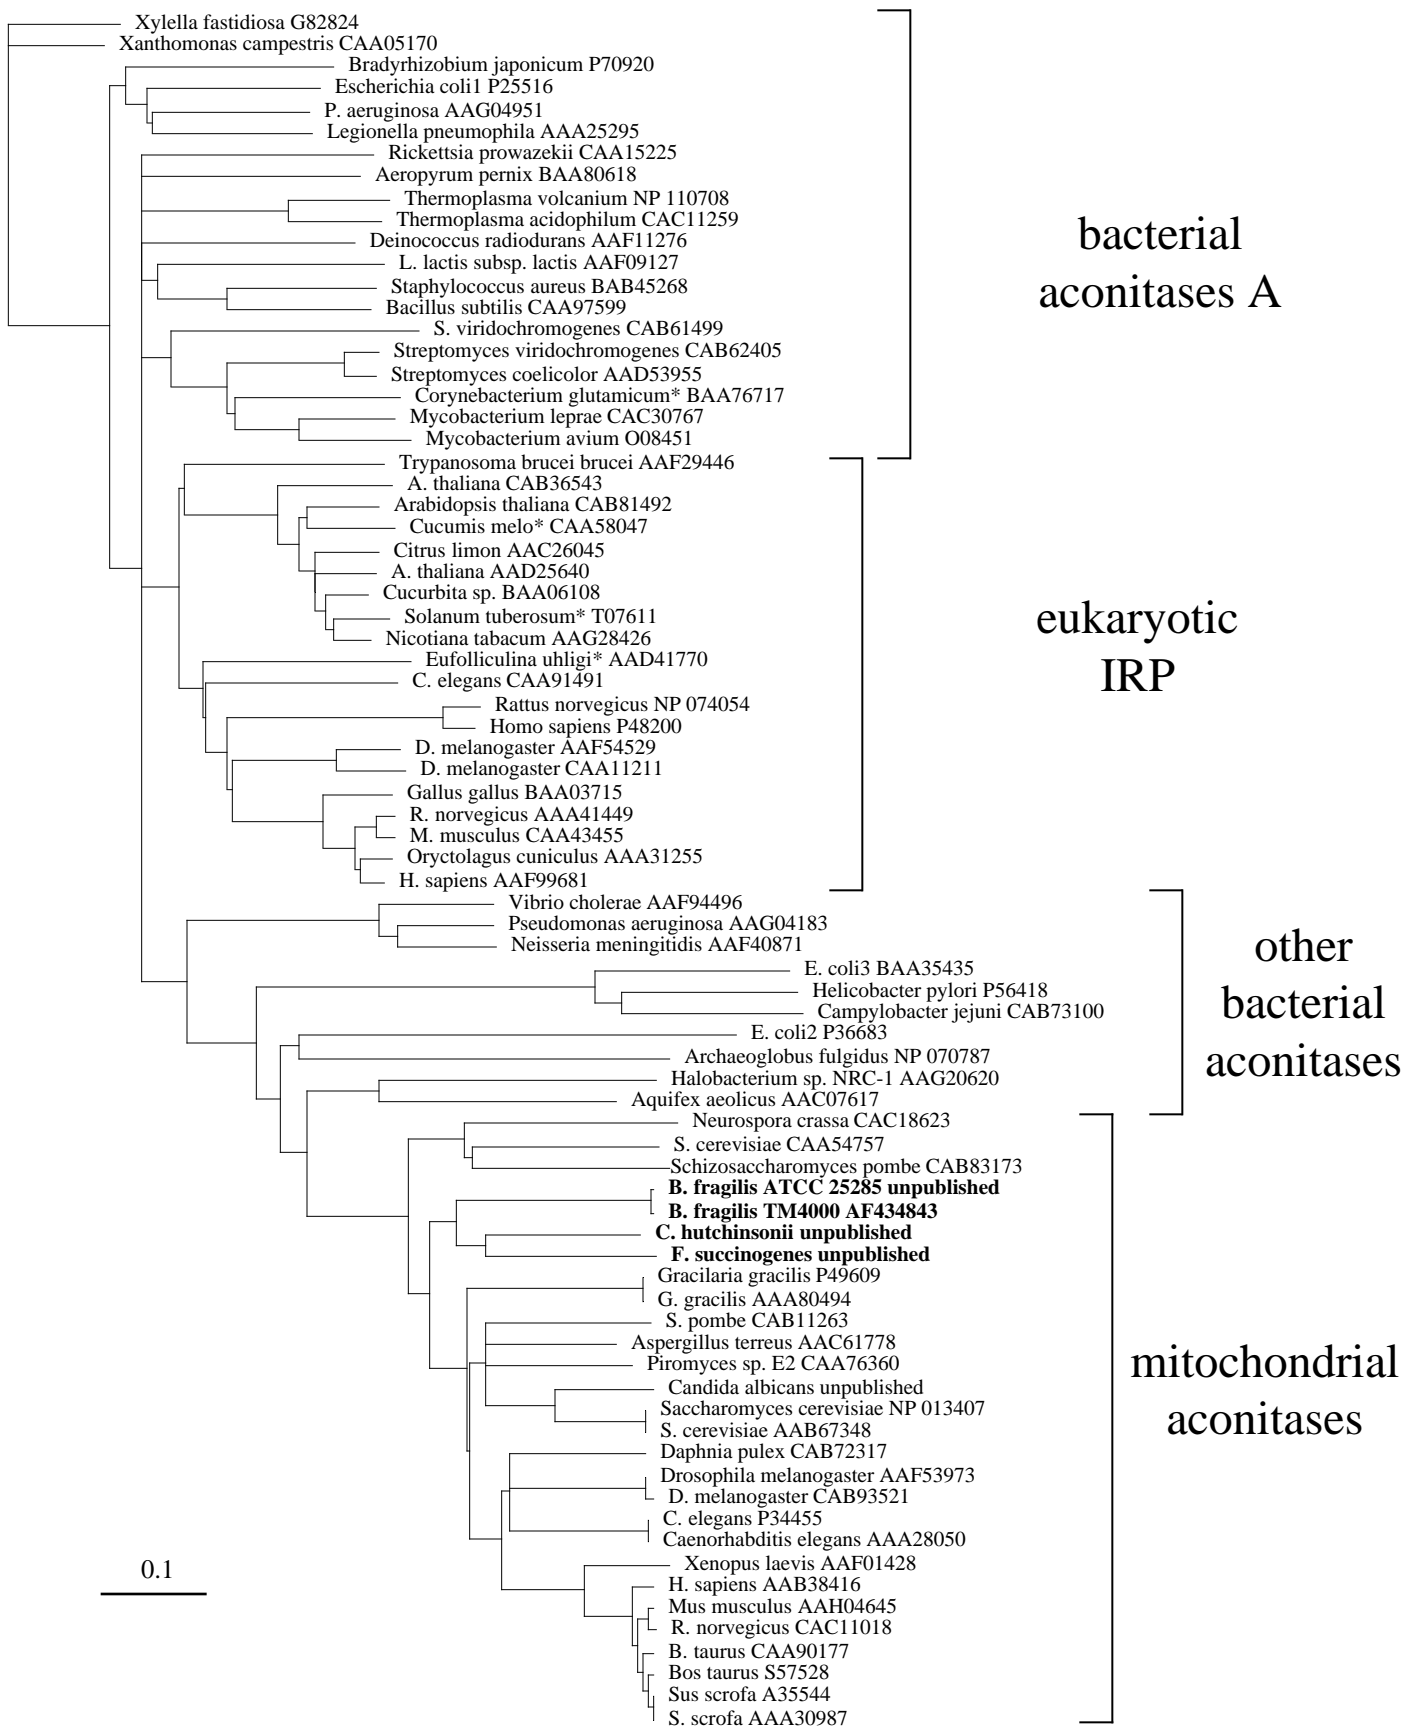

B. Phylogram of bacterial and eukaryotic isocitrate dehydrogenase protein sequences.

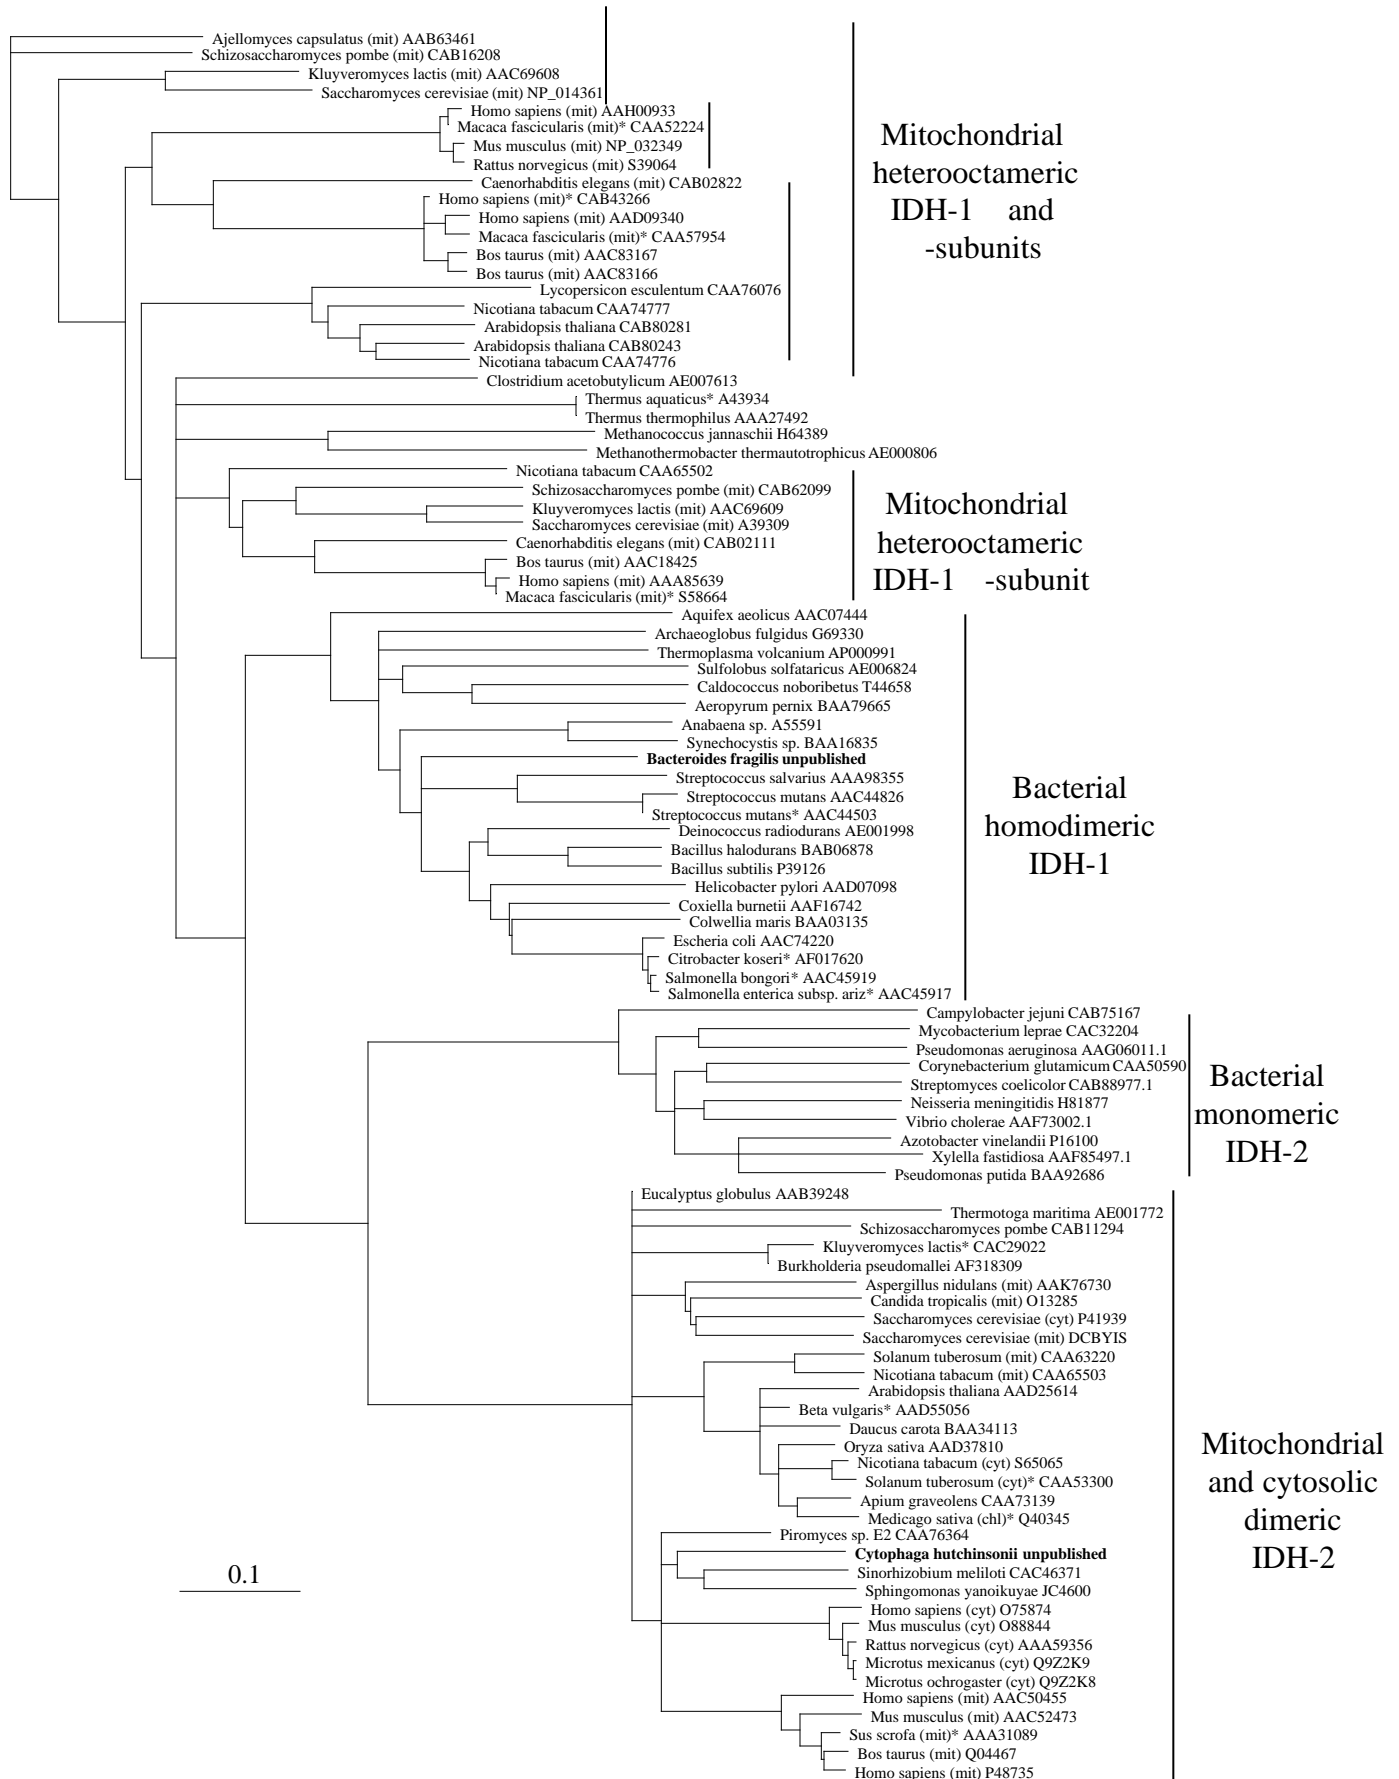

Supplement: pnas_052710199_2.pdf [file pnas_052710199_2.pdf]
